# Supplementary material
Source: PubMed Central journal article supplement (PMC5470413)
Supplement: jamacardiol-2-361-s001.pdf [file jamacardiol-2-361-s001.pdf]

## Supplementary Online Content

Pokharel Y, Tang F, Jones PG, et al. Adoption of the 2013 American College of Cardiology/American Heart Association Cholesterol Management Guideline in cardiology practices nationwide. *JAMA Cardiol*. Published online March 1, 2017. doi:10.1001/jamacardio.2016.5922

**eTable.** Overall Use of Statin and Its Dose Intensity During Each Guideline Period

**eFigure 1.** Eligible Patients Not on Any Lipid-Lowering Therapy During Each Guideline Period

**eFigure 2.** Trends in the Use of Moderate-High Intensity Statin and Non-statin LLT in Patients  $\geq 21$  Years With ASCVD

**eFigure 3.** Trends in the Use of Moderate-High Intensity Statin and Non-statin LLT in Patients  $\geq 21$  Years With LDL-C  $\geq 190$  mg/dL

**eFigure 4.** Trends in the Use of Moderate-High Intensity Statin and Non-statin LLT in 40-75 Years Old Diabetic Patients With LDL-C 70-189 mg/dL and Without ASCVD

**eFigure 5.** Trends in the Use of Moderate-High Intensity Statin and Non-statin LLT in 40-75 Years Old Primary Prevention Cohort With 10 Year ASCVD Risk  $\geq 7.5\%$  and LDL-C 70-189 mg/dL, and Without Diabetes

**eFigure 6.** Trends in the Use of Moderate-High Intensity Statin and Non-statin LLT in 40-75 Years Old Primary Prevention Cohort With 10 Year FRS  $\geq 10\%$  and LDL-C  $\geq 130$  mg/dL or 10 Year FRS  $< 10\%$  and LDL-C  $\geq 160$  mg/dL

**eFigure 7.** Overall Use of LLT During Each Guideline Period in the ATP III Primary Prevention Cohort

This supplementary material has been provided by the authors to give readers additional information about their work.

**eTable.** Overall Use of Statin and Its Dose Intensity During Each Guideline Period

| Cohorts                                  | Statin therapy (%)   |      |                      |      |                           |      |                       |      |                     |      |
|------------------------------------------|----------------------|------|----------------------|------|---------------------------|------|-----------------------|------|---------------------|------|
|                                          | Any intensity statin |      | Low intensity statin |      | Moderate intensity statin |      | High intensity statin |      | Statin dose unknown |      |
|                                          | Pre                  | Post | Pre                  | Post | Pre                       | Post | Pre                   | Post | Pre                 | Post |
| <b>Overall group</b>                     | 70.9                 | 75.9 | 7.2                  | 7.7  | 39.0                      | 39.1 | 23.1                  | 27.5 | 1.6                 | 1.6  |
| <b>ASCVD</b>                             | 71.4                 | 76.2 | 7.1                  | 7.7  | 39.2                      | 39.2 | 23.5                  | 27.8 | 1.6                 | 1.6  |
| <b>Elevated LDL-C</b>                    | 59.2                 | 60.9 | 7.5                  | 6.9  | 32.6                      | 31.0 | 18.0                  | 21.3 | 1.0                 | 1.7  |
| <b>Diabetes</b>                          | 63.8                 | 67.0 | 10.5                 | 10.3 | 38.4                      | 38.0 | 14.0                  | 17.2 | 1.0                 | 1.5  |
| <b>ACC/AHA primary prevention</b>        | 51.2                 | 55.1 | 8.9                  | 7.3  | 32.1                      | 35.2 | 9.8                   | 11.7 | 0.5                 | 0.9  |
| <b>Without heart failure<sup>a</sup></b> | 50.8                 | 55.2 | 8.7                  | 7.2  | 31.8                      | 35.7 | 9.7                   | 11.3 | 0.5                 | 1.0  |

<sup>a</sup>Among patients from the ACC/AHA primary prevention group

ACC/AHA = American College of Cardiology/American Heart Association, ASCVD = atherosclerotic cardiovascular disease, LDL-C = low-density lipoprotein cholesterol, LLT = lipid lowering therapy

**eFigure 1. Eligible Patients Not on Any Lipid-Lowering Therapy During Each Guideline Period**

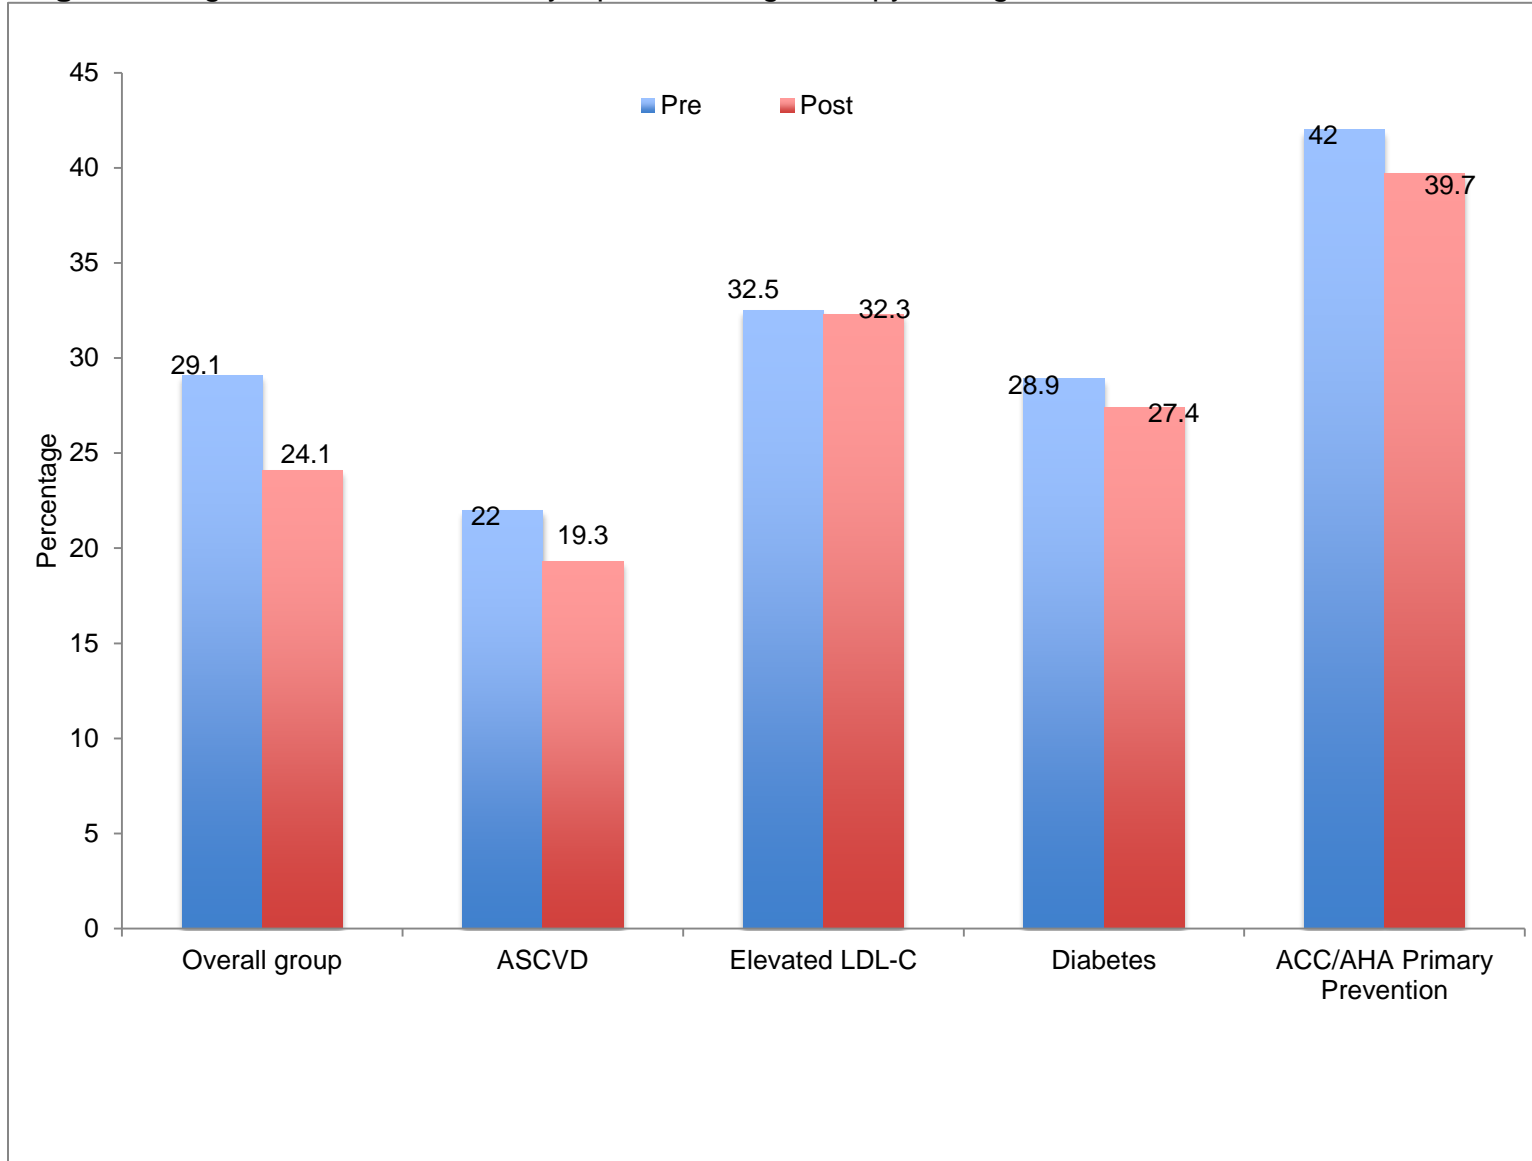

ACC/AHA = American College of Cardiology/American Heart Association, ASCVD = atherosclerotic cardiovascular disease, LDL-C = low-density lipoprotein cholesterol

**eFigure 2.** Trends in the Use of Moderate-High Intensity Statin and Non-statin LLT in Patients ≥21 Years With ASCVD

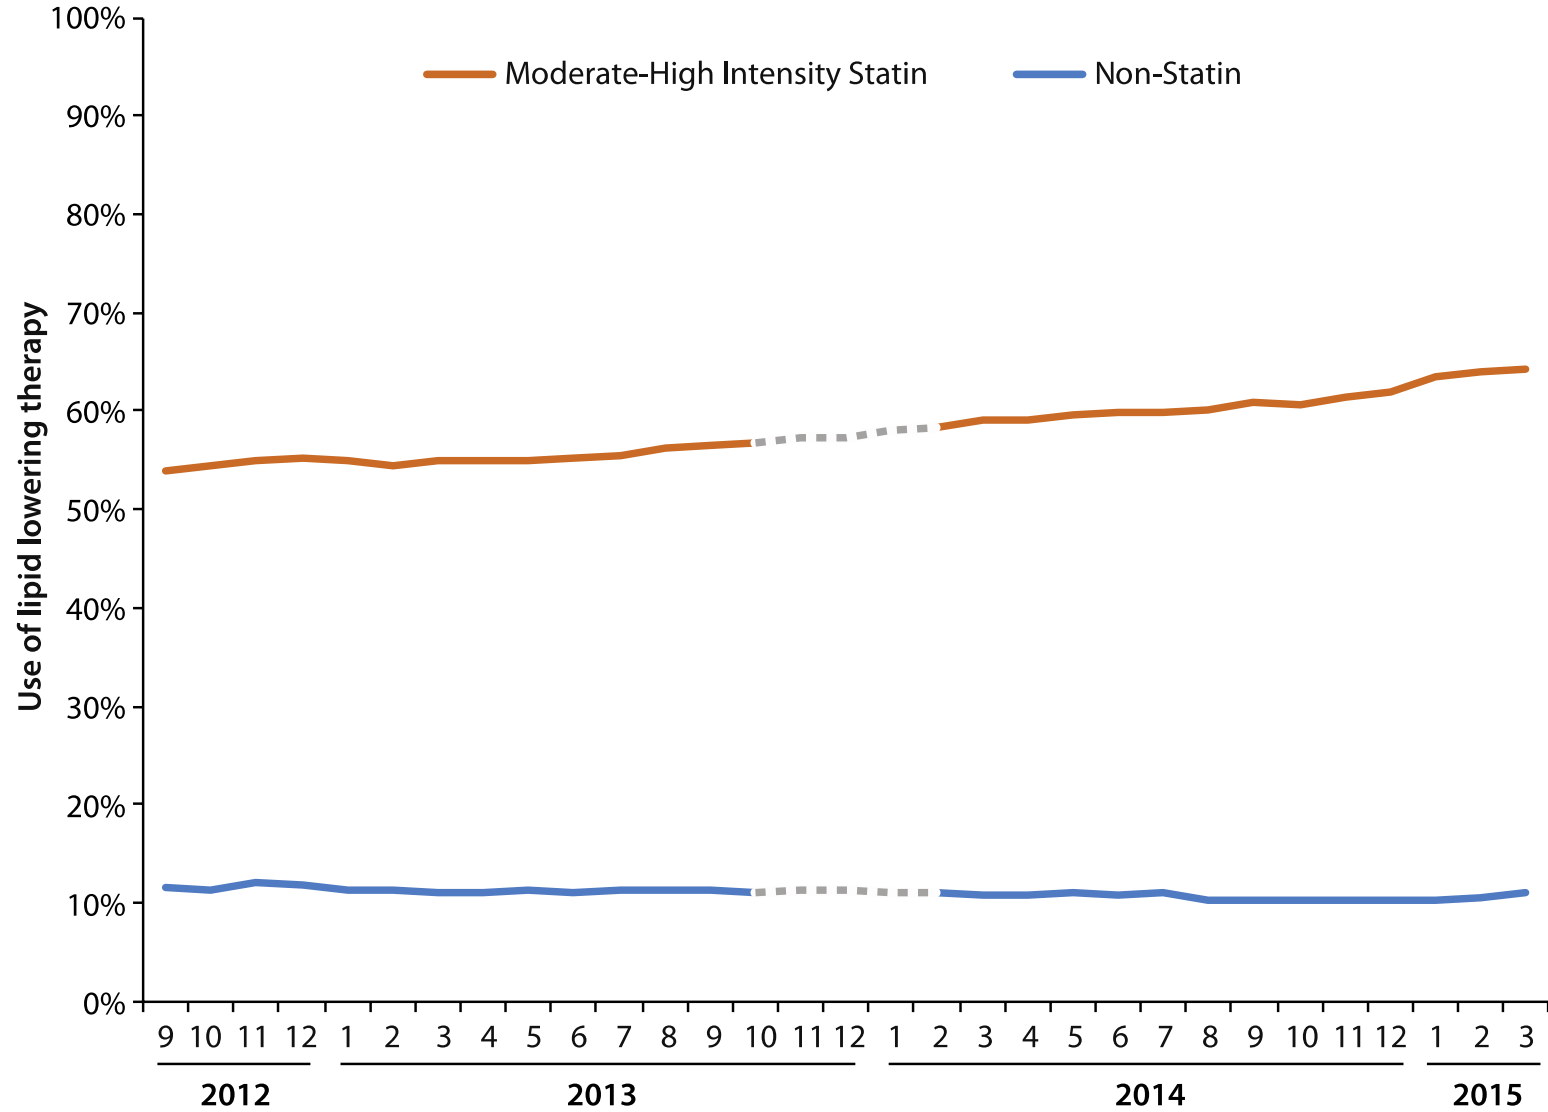

Dashed line reflects transition period. Patient encounters before and after ACC/AHA guidelines were 2,369,562 and 2,331,640, respectively  
 ASCVD = atherosclerotic cardiovascular disease, LLT = lipid lowering therapy

**eFigure 3.** Trends in the Use of Moderate-High Intensity Statin and Non-statin LLT in Patients  $\geq 21$  Years With LDL-C  $\geq 190$  mg/dL

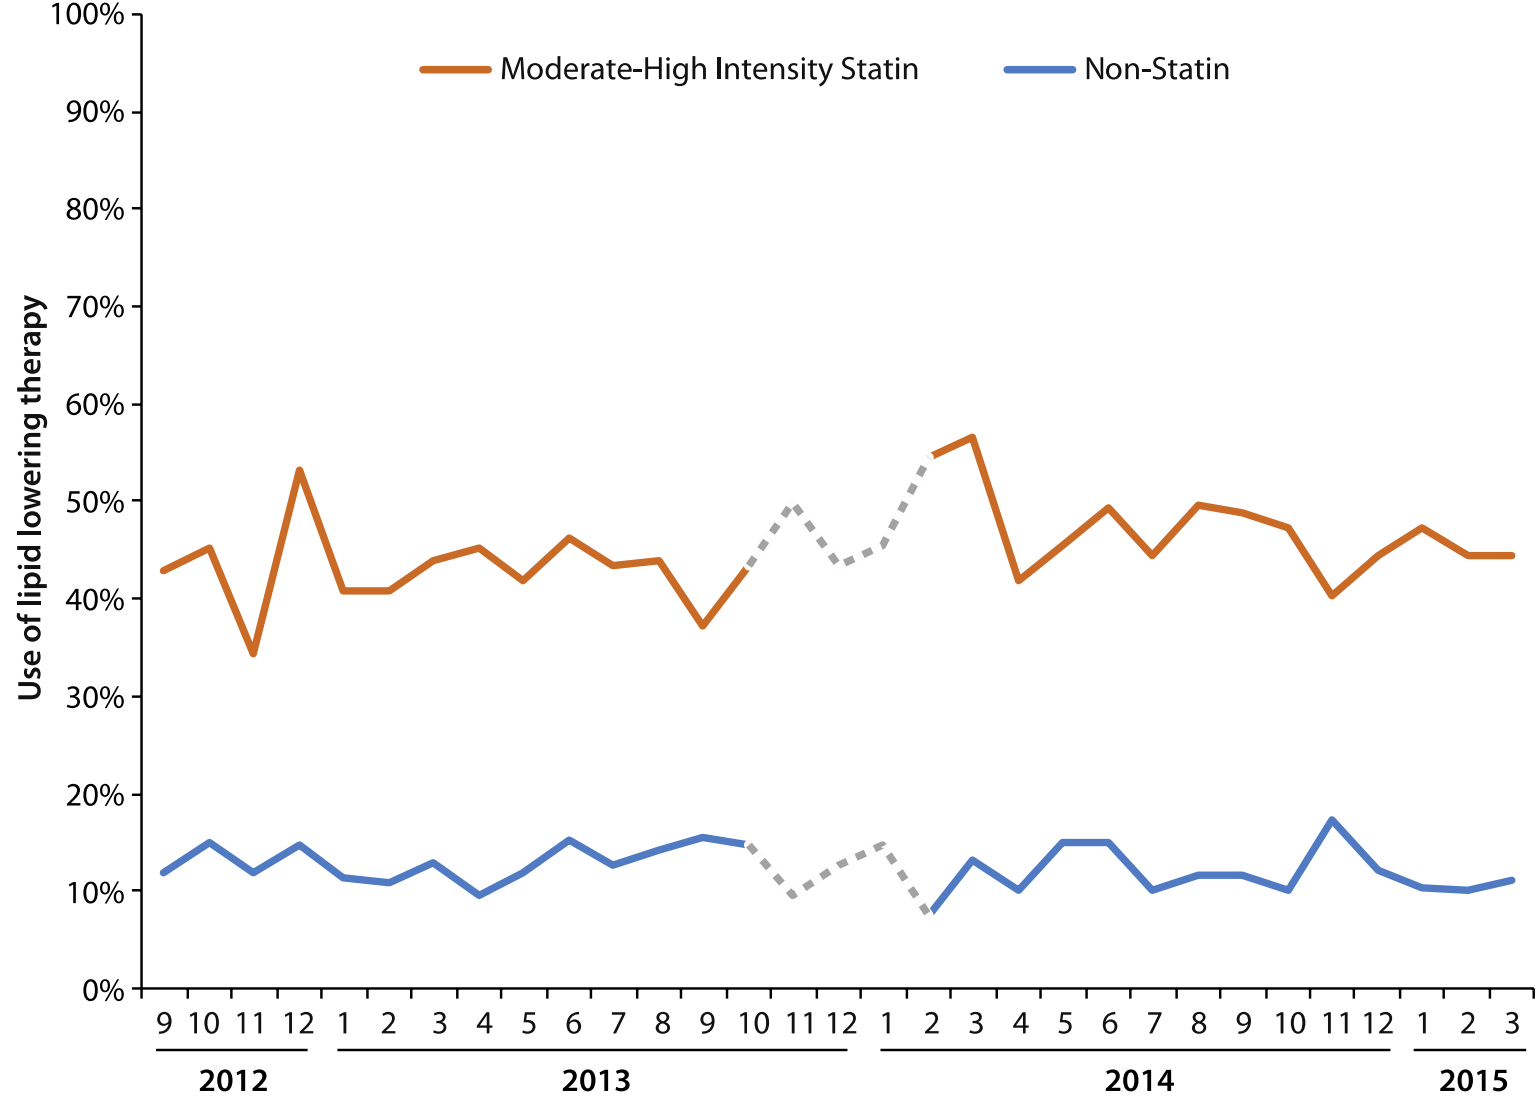

Dashed line reflects transition period. Patient encounters before and after ACC/AHA guidelines were 4,830 and 4,260, respectively  
 LDL-C = low-density lipoprotein cholesterol, LLT = lipid lowering therapy

**eFigure 4.** Trends in the Use of Moderate-High Intensity Statin and Non-statin LLT in 40-75 Years Old Diabetic Patients With LDL-C 70-189 mg/dL and Without ASCVD

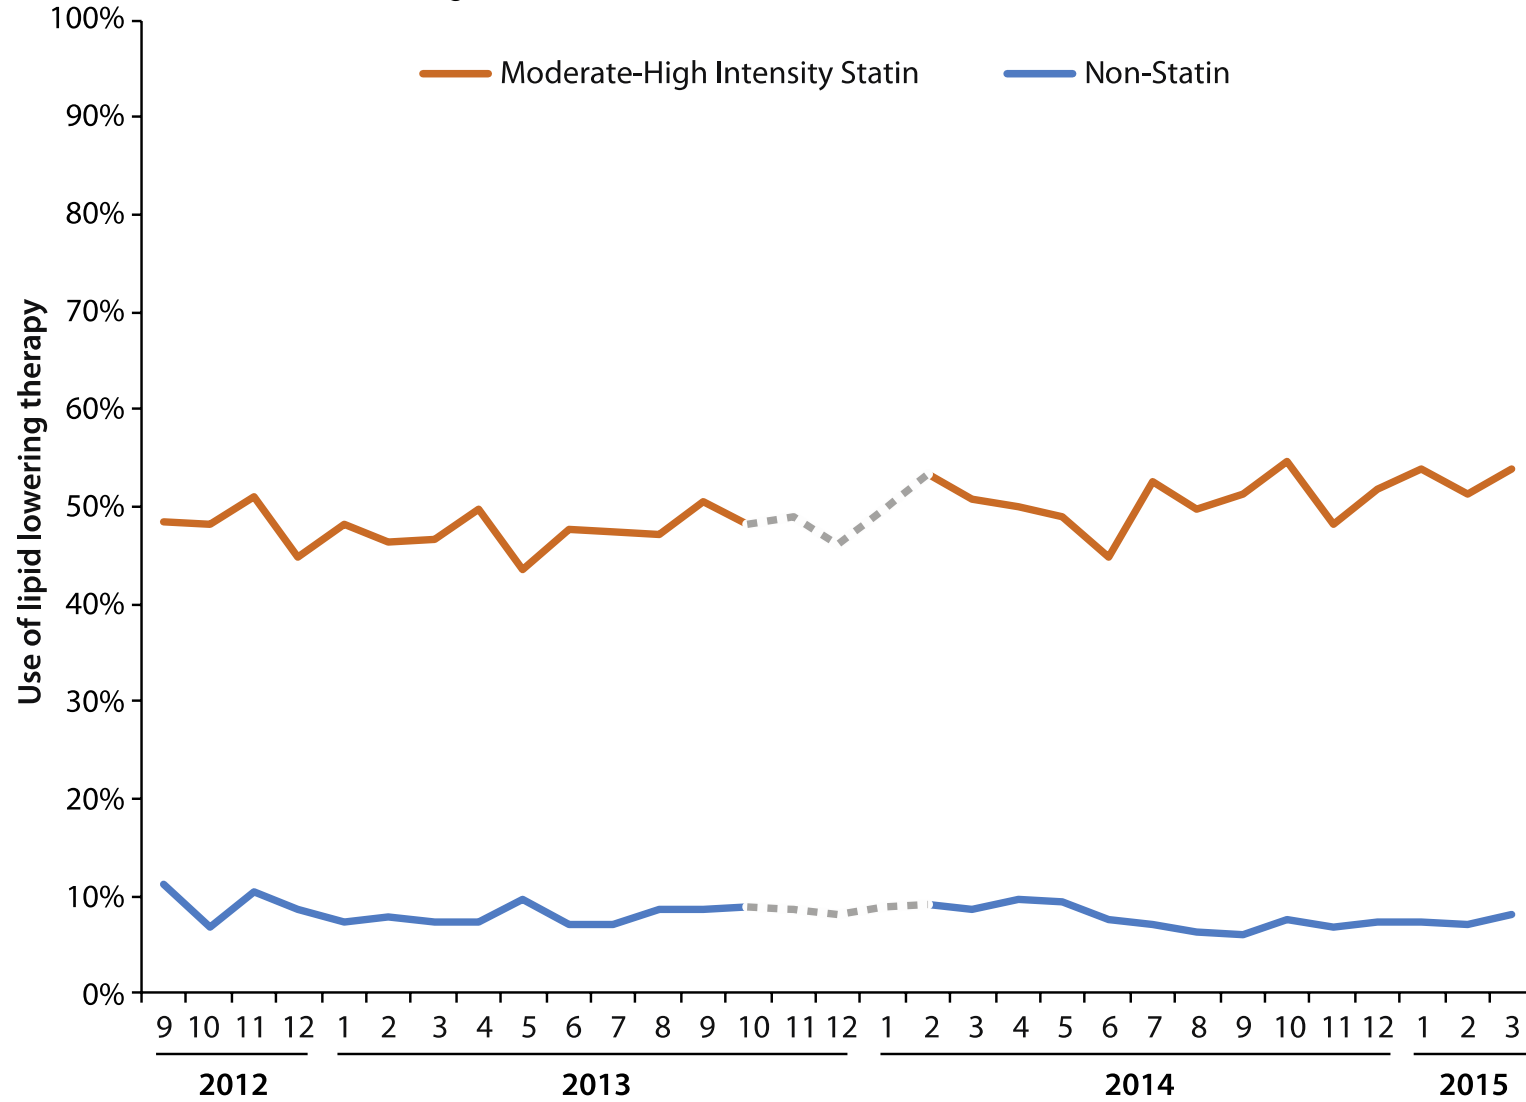

Dashed line reflects transition period. Patient encounters before and after ACC/AHA guidelines were 27,511 and 21,387, respectively  
 ASCVD = atherosclerotic cardiovascular disease, LDL-C = low-density lipoprotein cholesterol, LLT = lipid lowering therapy

**eFigure 5.** Trends in the Use of Moderate-High Intensity Statin and Non-statin LLT in 40-75 Years Old Primary Prevention Cohort With 10 Year ASCVD Risk  $\geq 7.5\%$  and LDL-C 70-189 mg/dL, and Without Diabetes

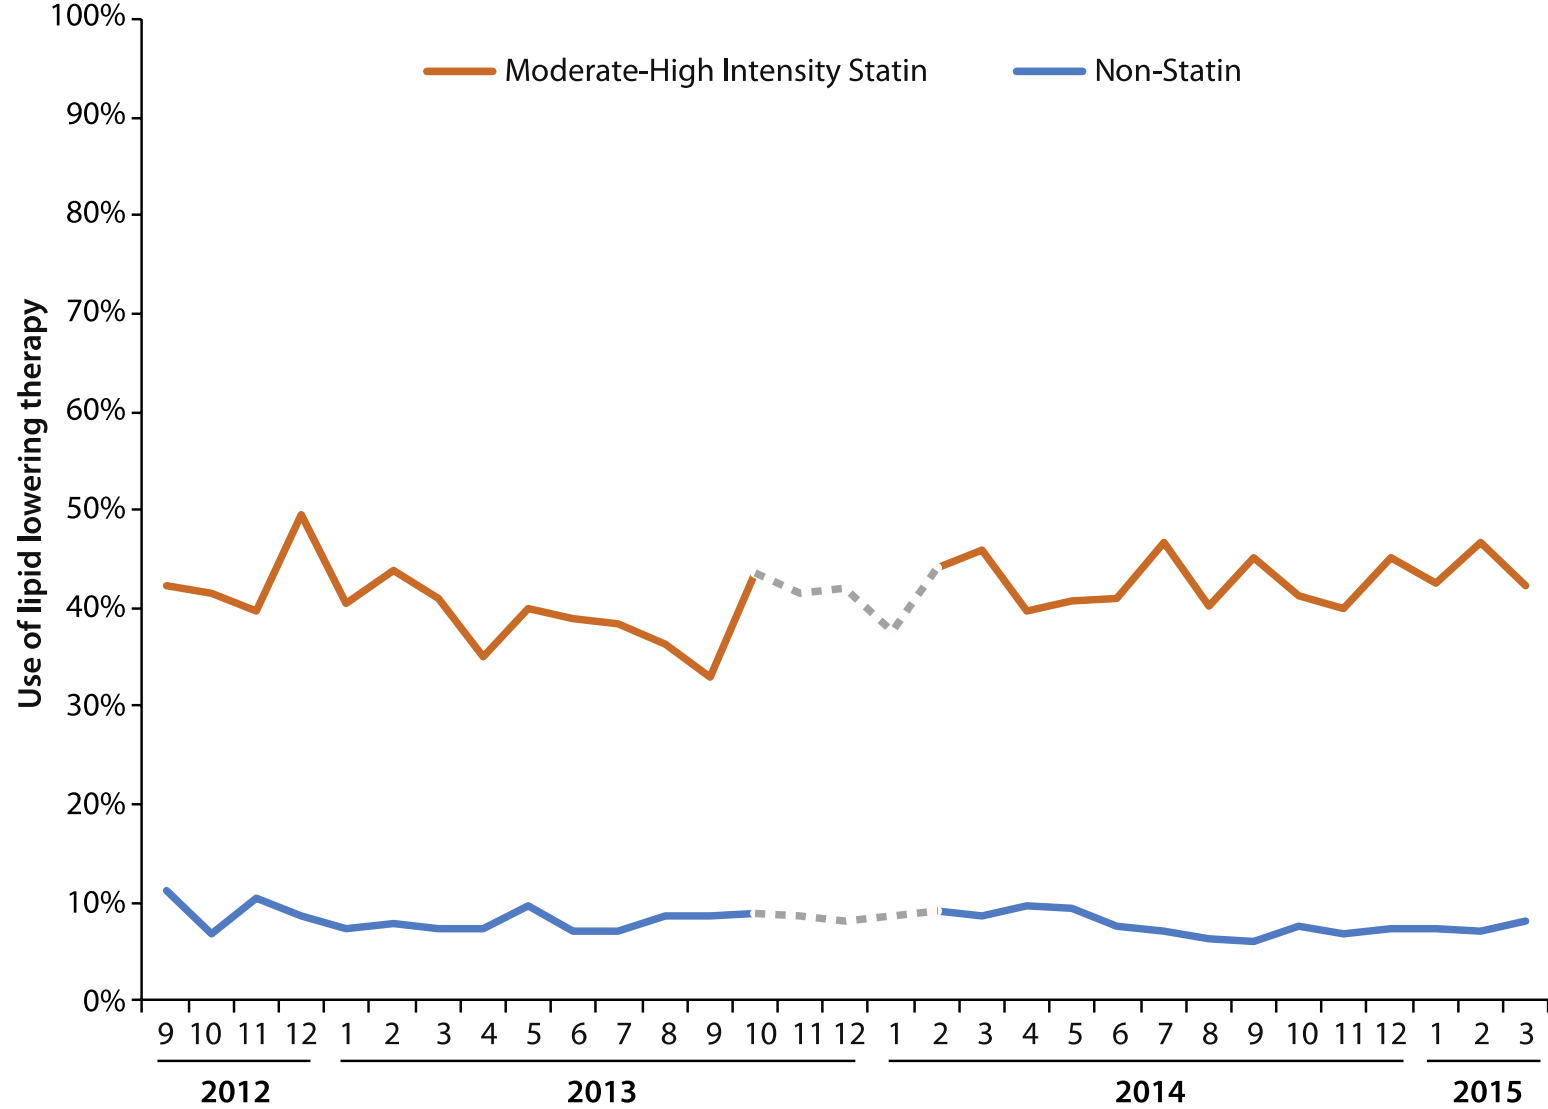

Dashed line reflects transition period. Patient encounters before and after ACC/AHA guidelines were 26,163 and 16,880, respectively  
 ASCVD = atherosclerotic cardiovascular disease, LDL-C = low-density lipoprotein cholesterol, LLT = lipid lowering therapy

**eFigure 6.** Trends in the Use of Moderate-High Intensity Statin and Non-statin LLT in 40-75 Years Old Primary Prevention Cohort With 10 Year FRS  $\geq 10\%$  and LDL-C  $\geq 130$  mg/dL or 10 Year FRS  $< 10\%$  and LDL-C  $\geq 160$  mg/dL

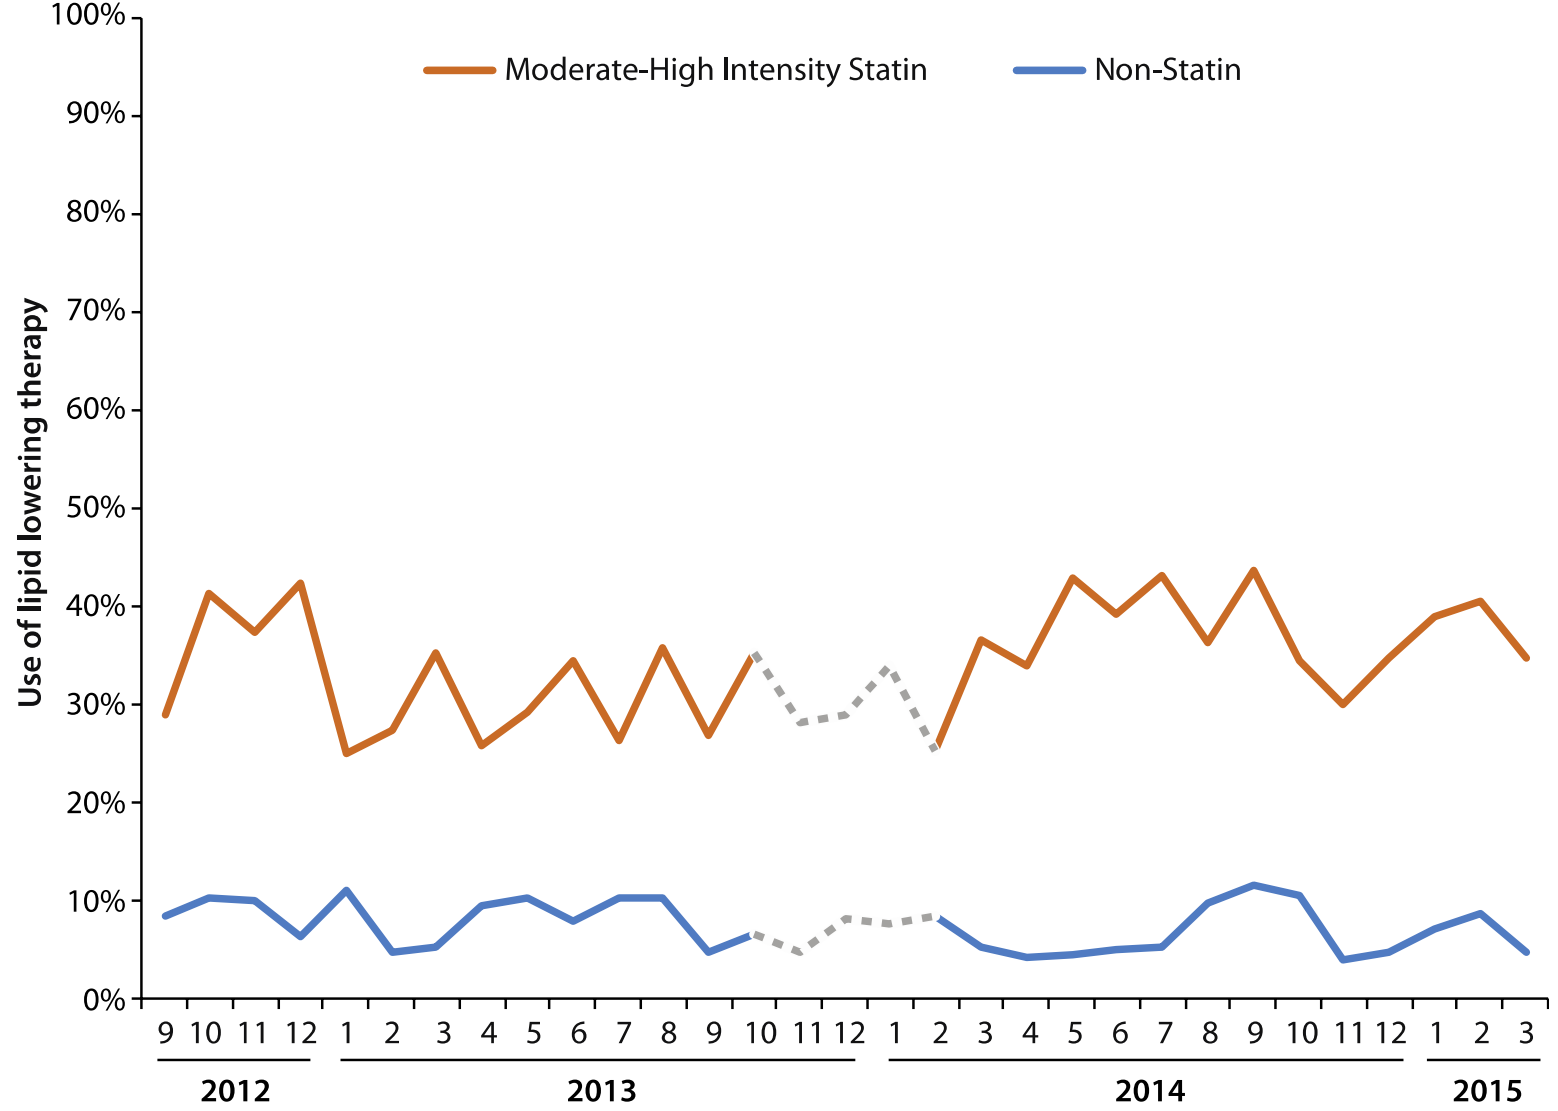

Dashed line reflects transition period. Patient encounters before and after ACC/AHA guidelines were 4,599 and 3,949, respectively  
 FRS = Framingham's risk score, LDL-C = low-density lipoprotein cholesterol, LLT = lipid lowering therapy



**eFigure 7.** Overall Use of LLT During Each Guideline Period in the ATP III Primary Prevention Cohort

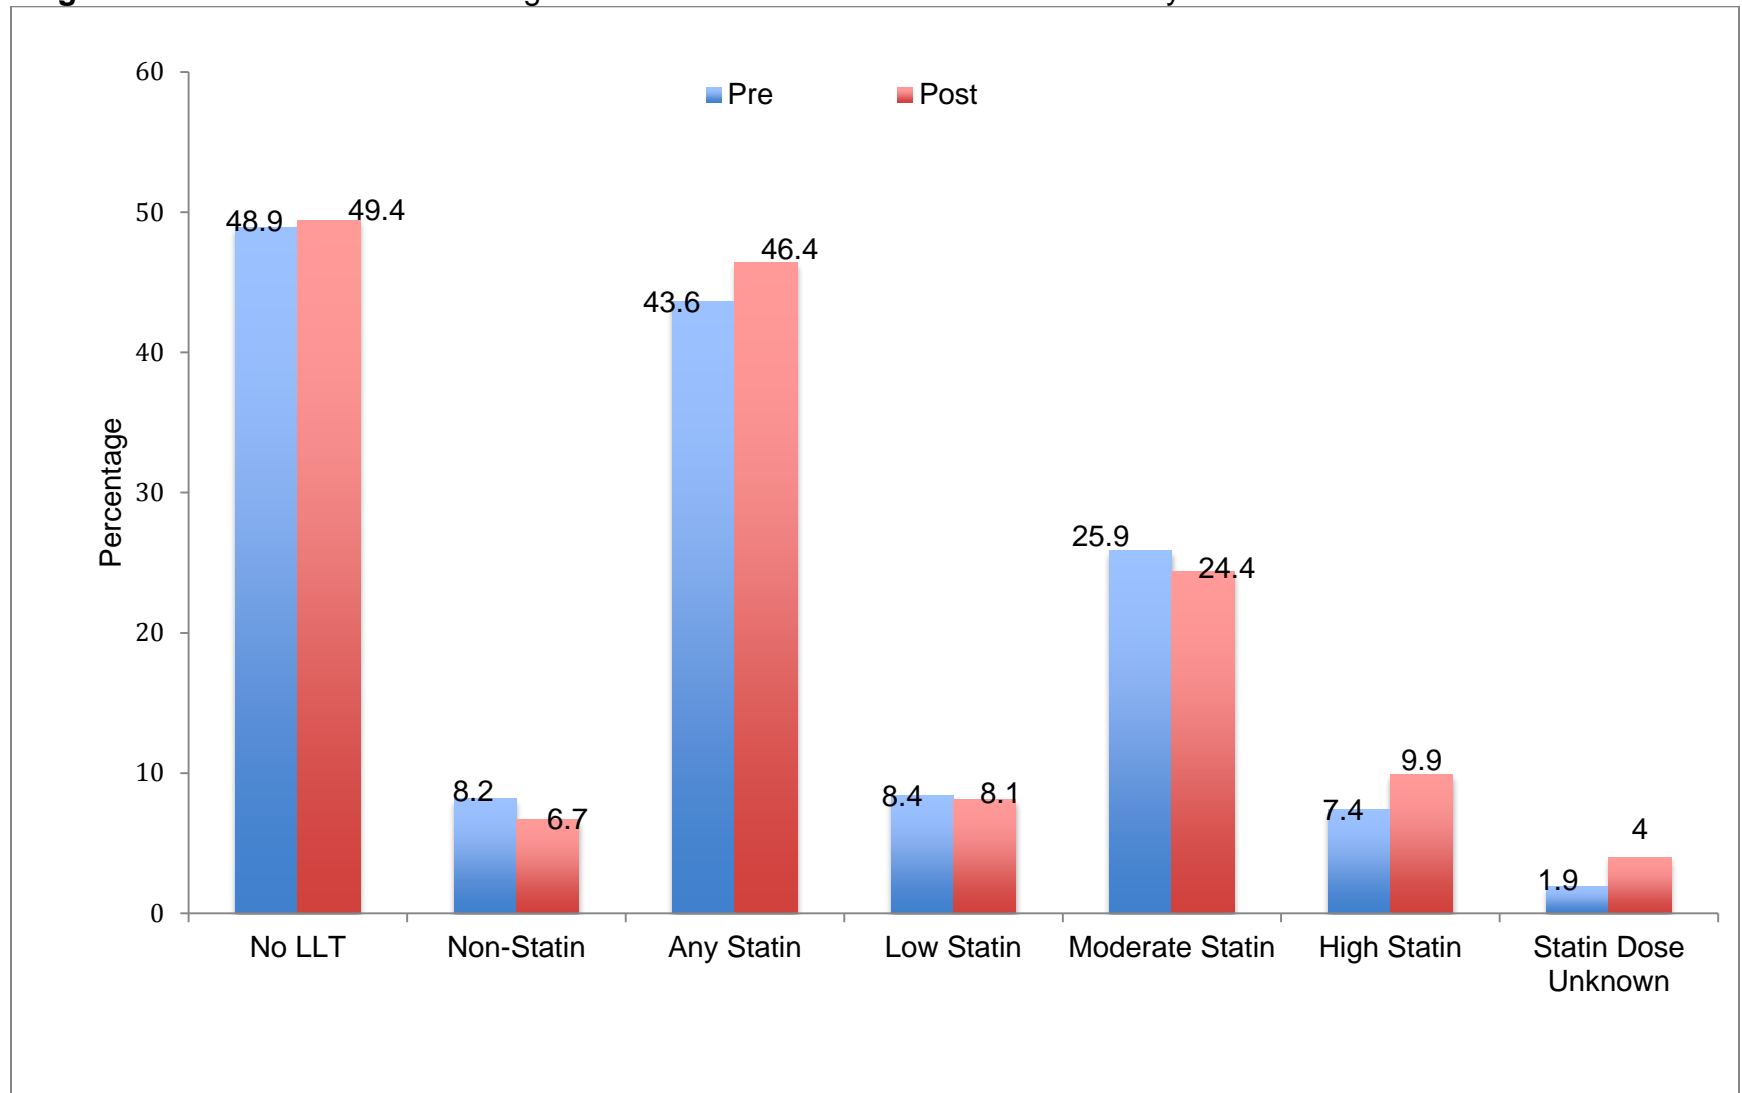

ATP III = Third Adult Treatment Panel for the Detection Evaluation and Treatment of High Blood Cholesterol in Adults, LLT = lipid lowering therapy
